# Supplementary material
Source: MDPI journal article supplement (https://www.mdpi.com/2071-1050/13/19/10924)

**Figure S2.** Growth kinetics of selected yeasts. Legend. The lines represent the absorbance data (OD605) and the bars represent the number of cells expressed in log (CFU/ ml) of three independent repeats and the SD.

A.

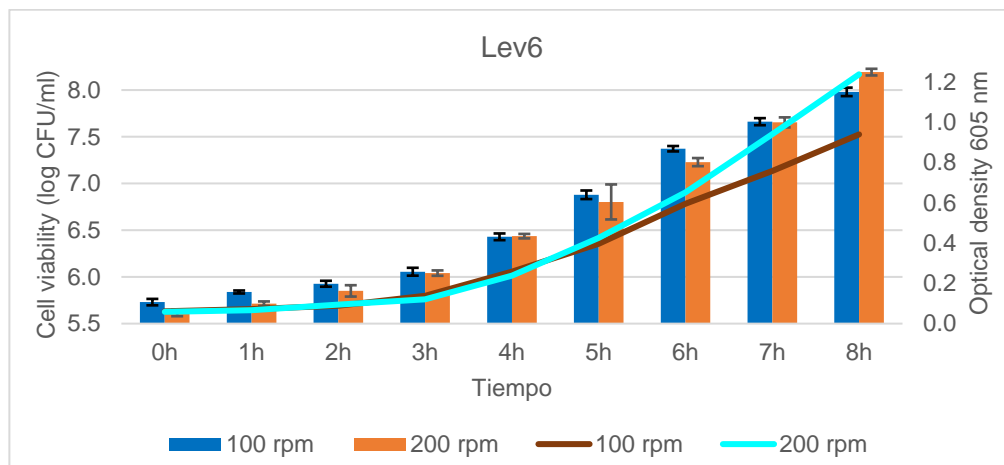

B.

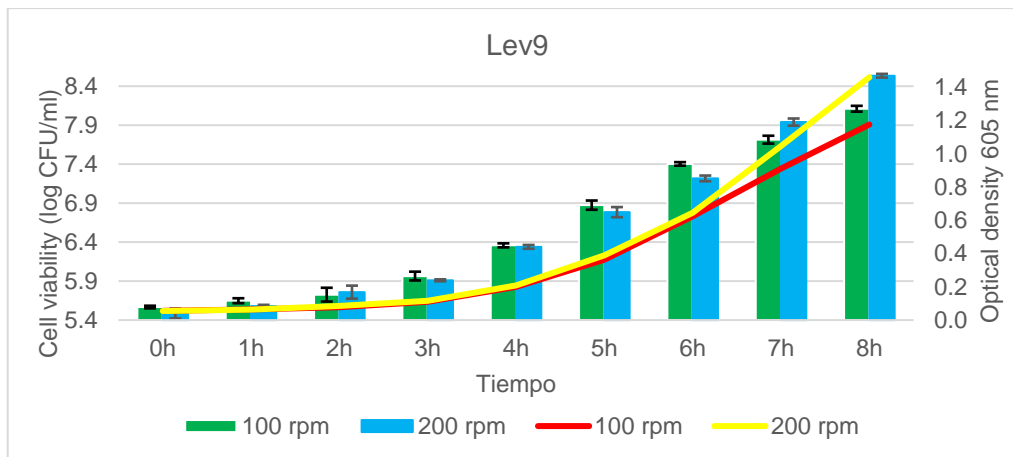

C.

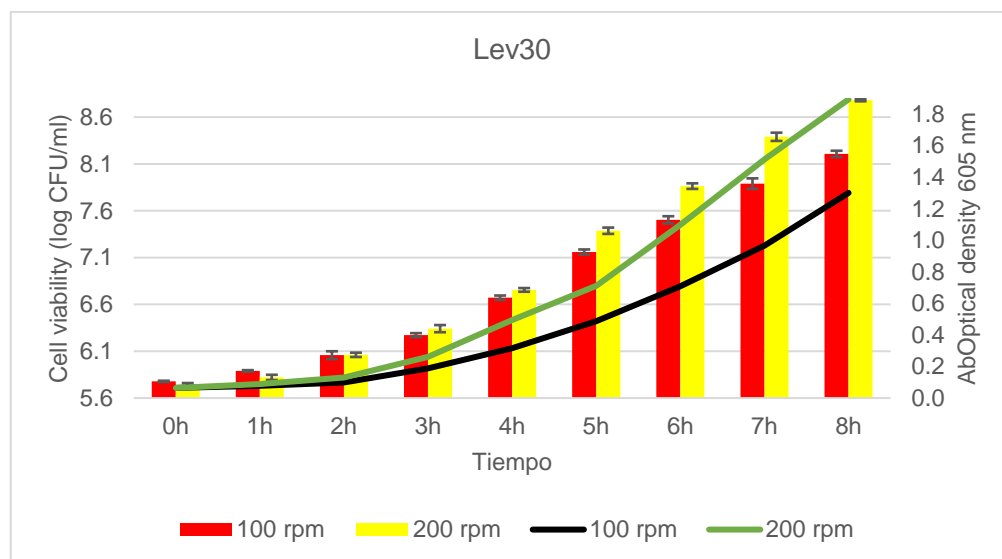

Supplement: s1 [file s1 › Figure S2.pdf]
