# Supplementary material
Source: MDPI journal article supplement (https://www.mdpi.com/2071-1050/13/19/10924)

**Figure S3.** (A). Q-Q plot of the data obtained from the growth of native yeasts in YPD broth. (B). Dispersion diagram.

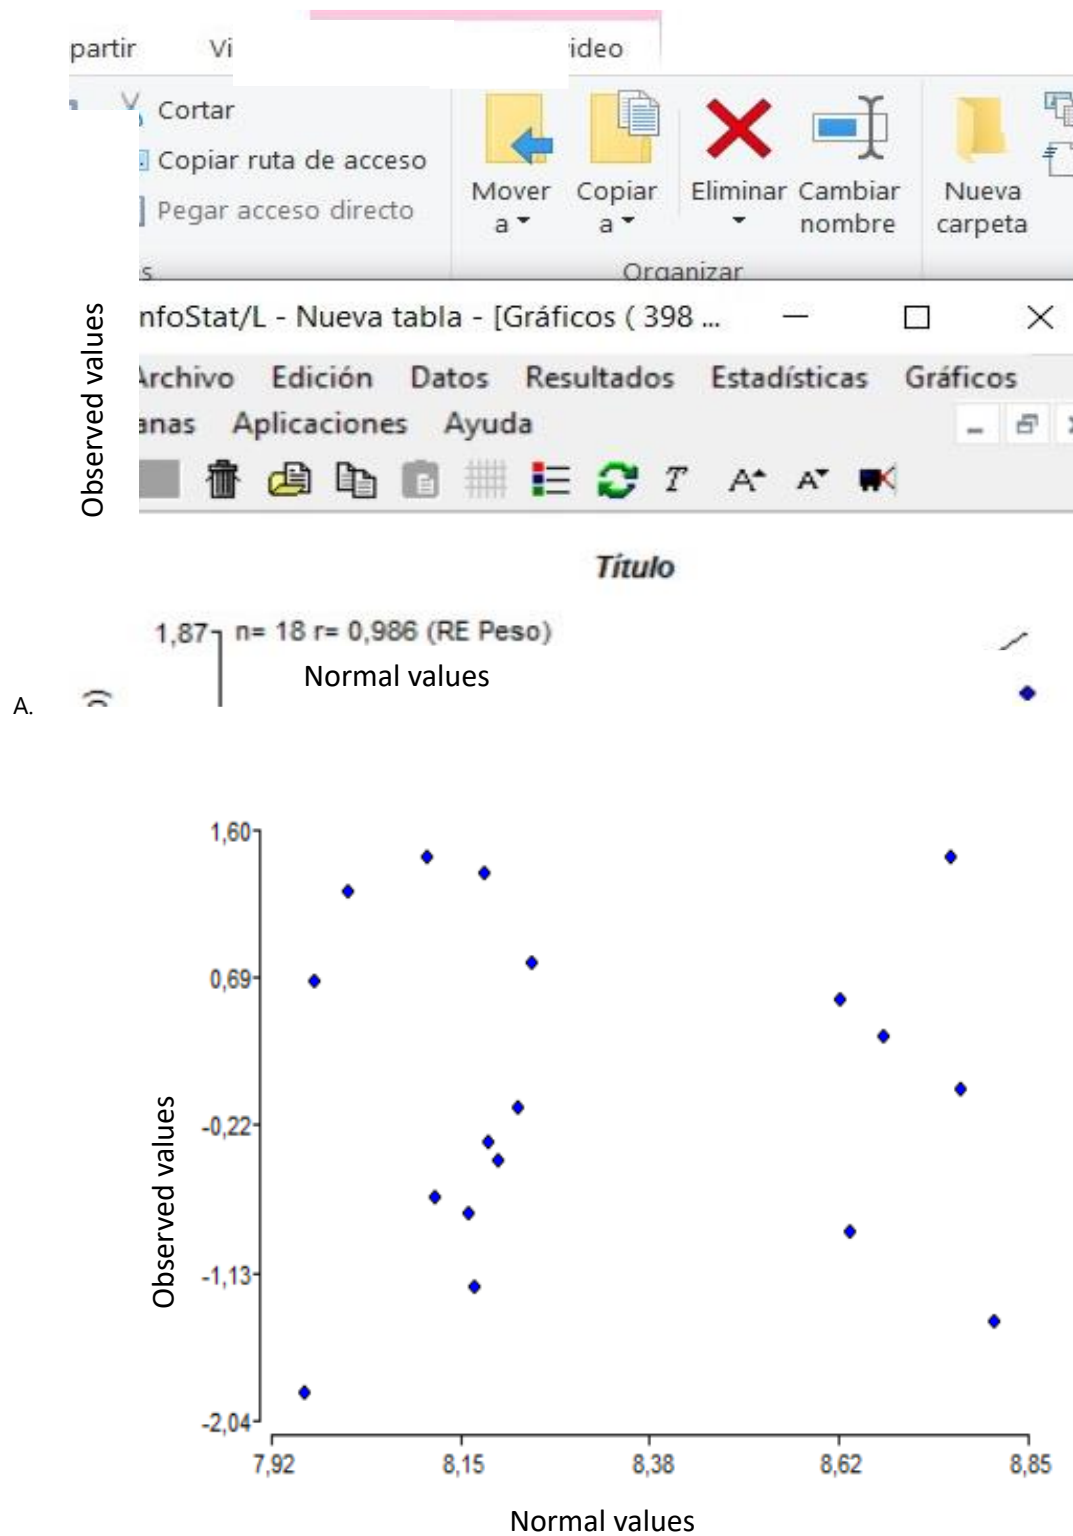

Supplement: s1 [file s1 › Figure S3.pdf]
