# Supplementary material
Source: MDPI journal article supplement (https://www.mdpi.com/2071-1050/13/19/10924)

**Figure S4.** Analysis of the variance of the  $\mu_{\max}$  (A) and pV values (B). The letters in each bar represent the statistical difference between each treatment. Bars with a letter in common are not significantly different. Legend: T1, T2, T3 are Lev6, Lev9 and Lev30; A1, A2: 100 and 200 rpm.

A.

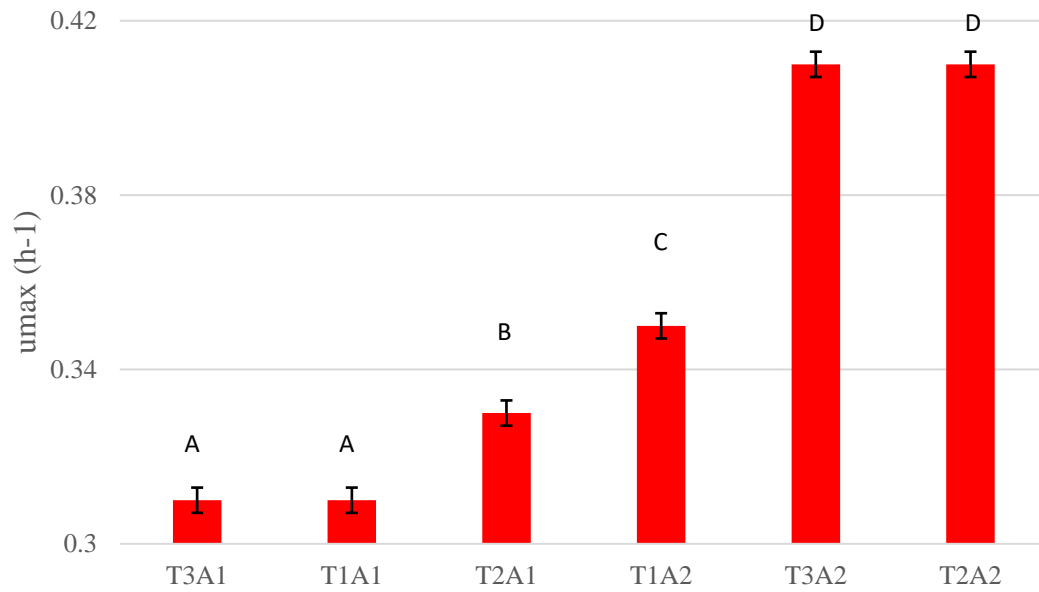

B.

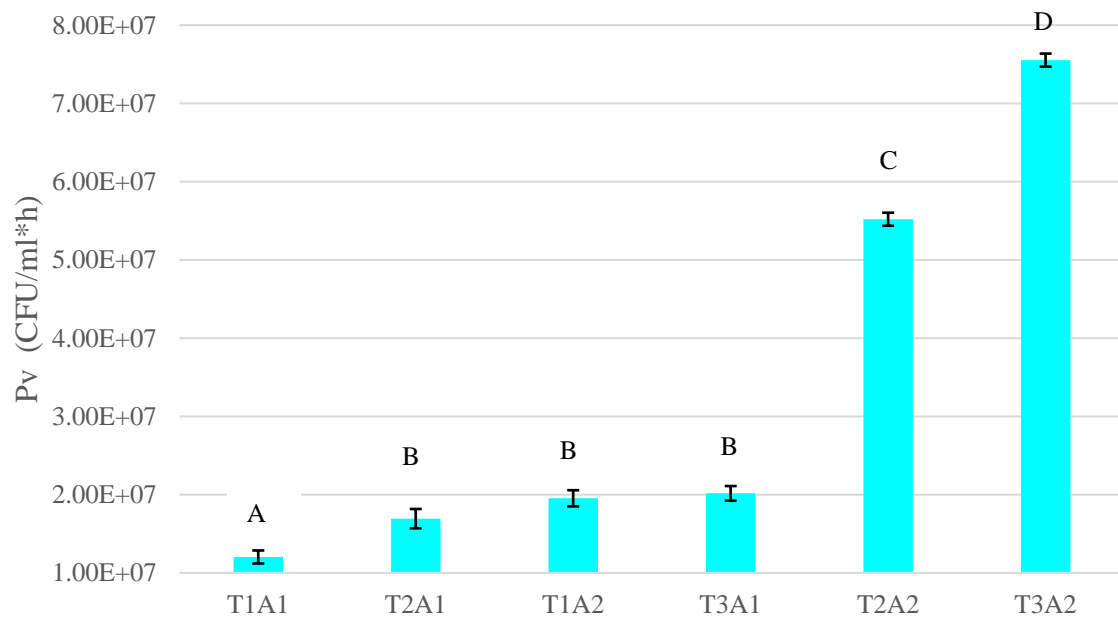

Supplement: s1 [file s1 › Figure S4.pdf]
