# Supplementary material
Source: MDPI journal article supplement (https://www.mdpi.com/2071-1050/13/19/10924)
Supplement: s1 [file s1 › Figure S5.pdf]

**Figure S5.** Chromatogram plots of byproducts detected by GS-MS analysis. A. Lev6; B. Lev9; C. Lev.30; D. Reference control 1; E. Reference control 2.

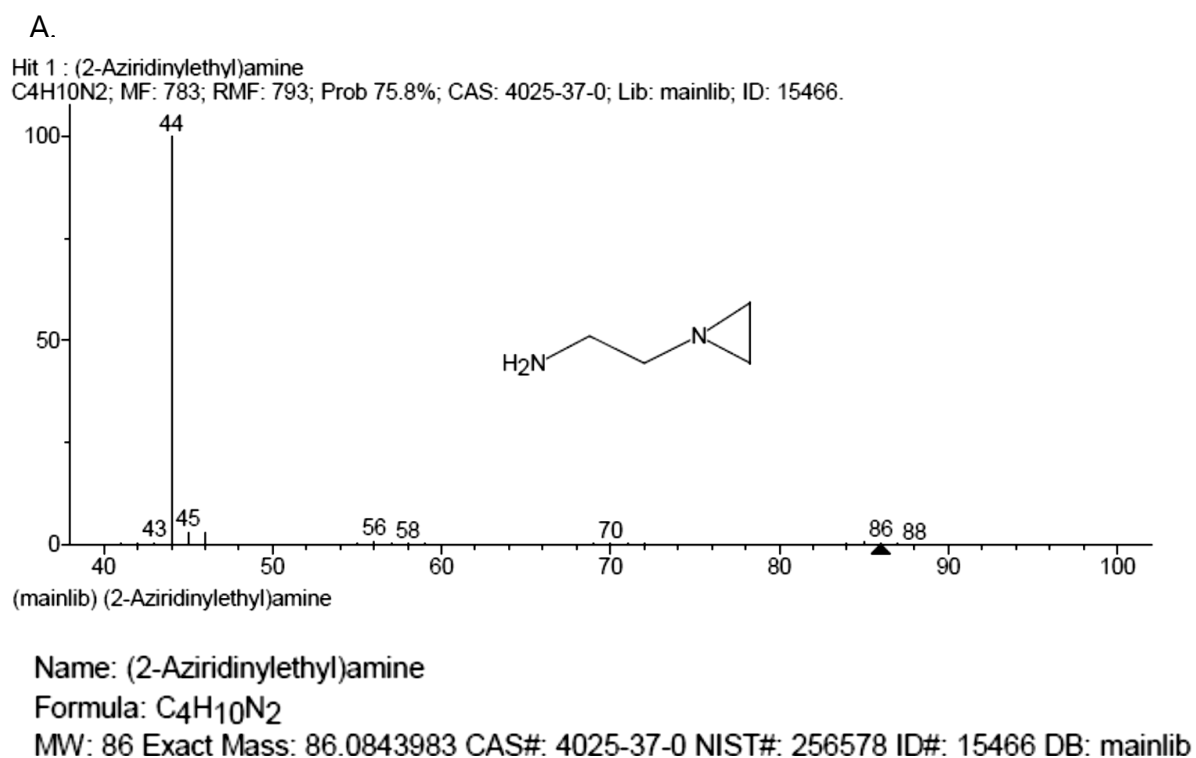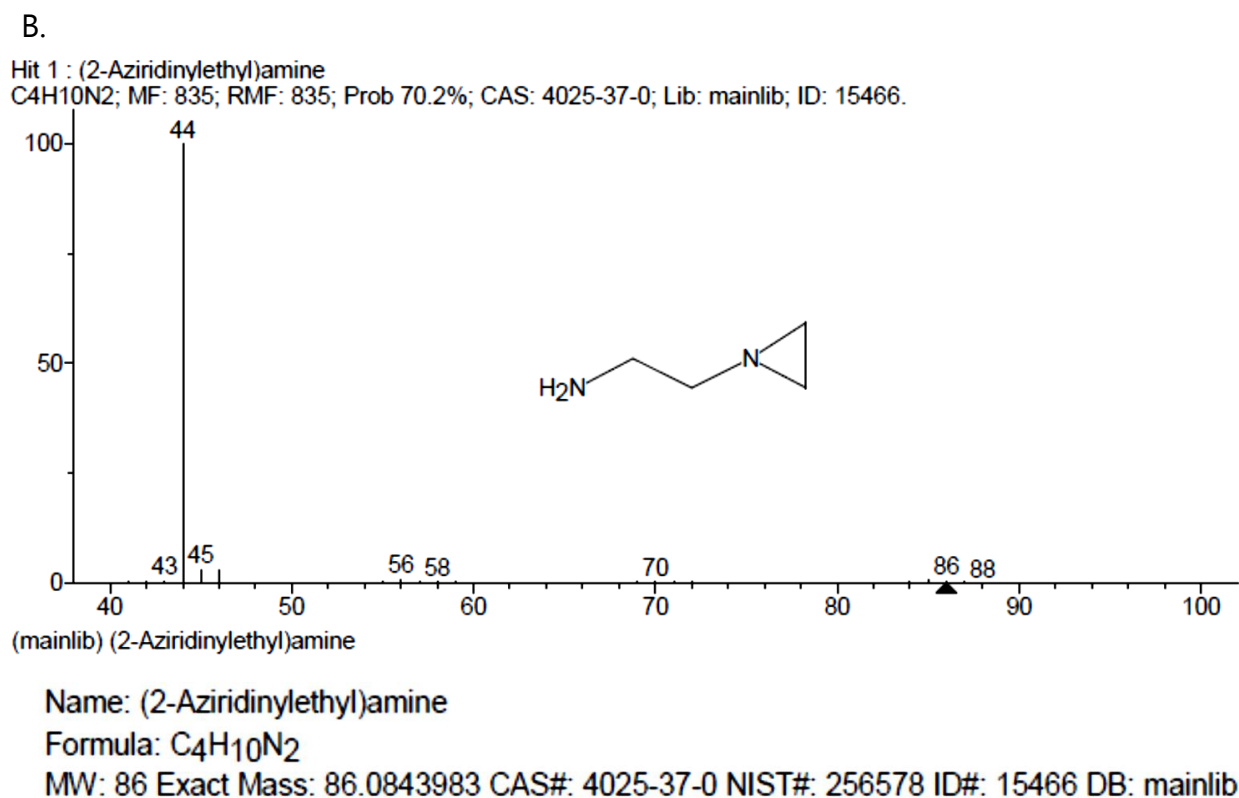

C. a.

Hit 1 : (2-Aziridinylethyl)amine

C<sub>4</sub>H<sub>10</sub>N<sub>2</sub>; MF: 845; RMF: 845; Prob 54.9%; CAS: 4025-37-0; Lib: mainlib; ID: 15466.

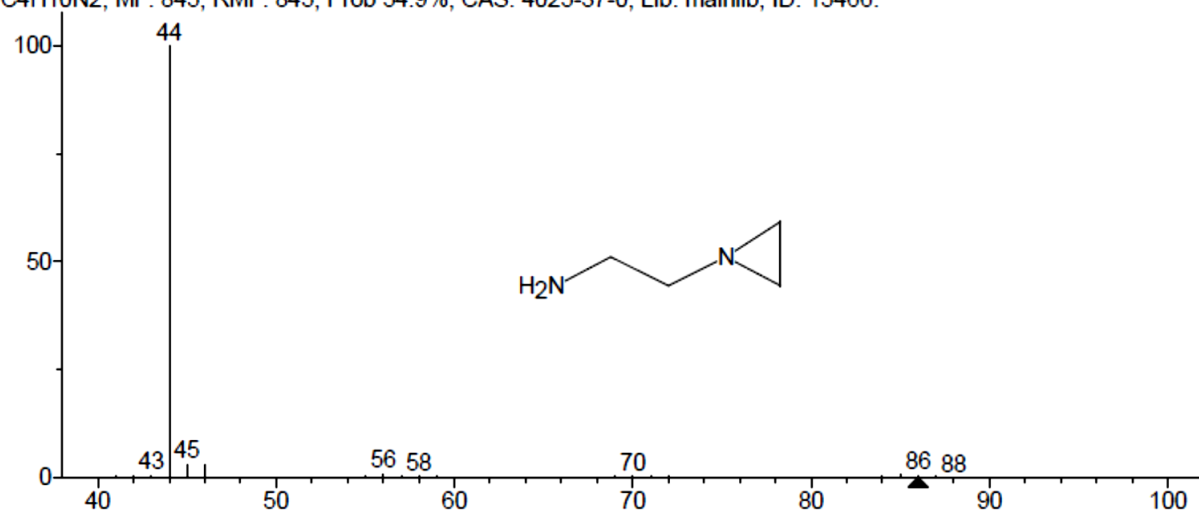

(mainlib) (2-Aziridinylethyl)amine

Name: (2-Aziridinylethyl)amine

Formula: C<sub>4</sub>H<sub>10</sub>N<sub>2</sub>

MW: 86 Exact Mass: 86.0843983 CAS#: 4025-37-0 NIST#: 256578 ID#: 15466 DB: mainlib

b.

Hit 1 : Tetraacetyl-d-xylonic nitrile

C<sub>14</sub>H<sub>17</sub>NO<sub>9</sub>; MF: 729; RMF: 752; Prob 31.1%; Lib: mainlib; ID: 15370.

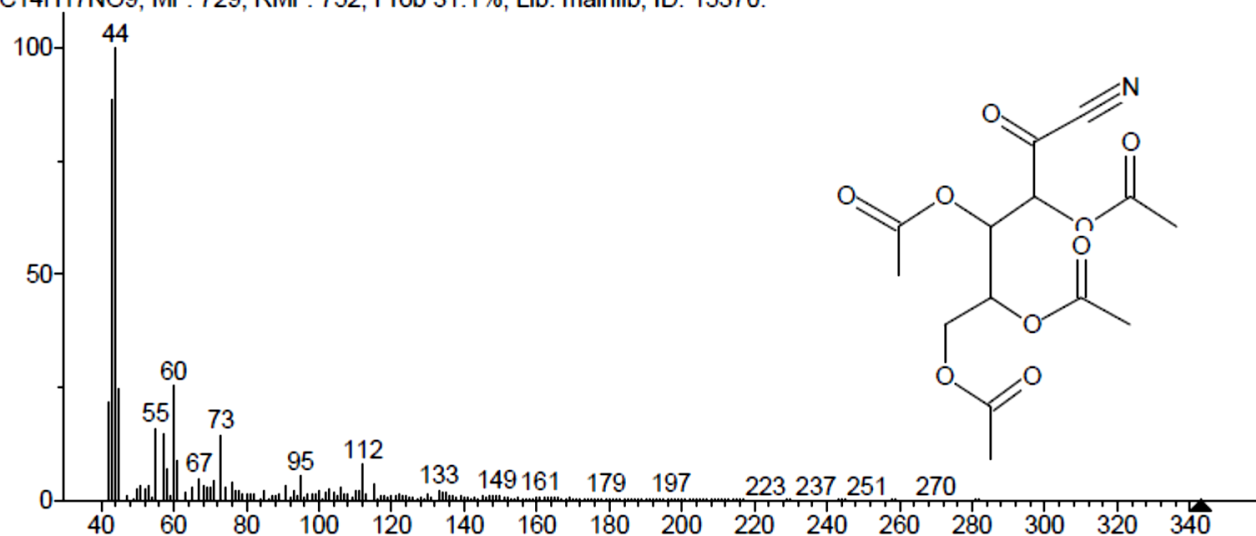

(mainlib) Tetraacetyl-d-xylonic nitrile

Name: Tetraacetyl-d-xylonic nitrile

Formula: C<sub>14</sub>H<sub>17</sub>NO<sub>9</sub>

MW: 343 Exact Mass: 343.090332 NIST#: 130044 ID#: 15370 DB: mainlib

D.

Hit 1 : (2-Aziridinylethyl)amine  
C<sub>4</sub>H<sub>10</sub>N<sub>2</sub>; MF: 858; RMF: 858; Prob 78.9%; CAS: 4025-37-0; Lib: mainlib; ID: 15466.

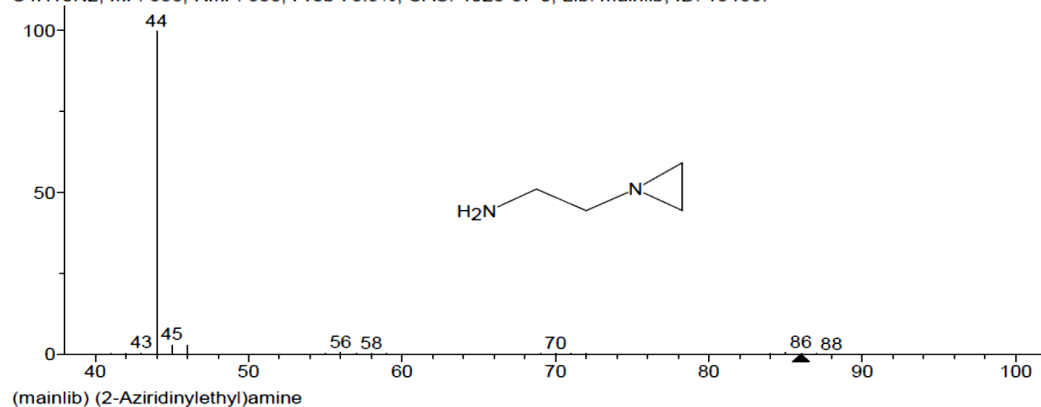

Name: (2-Aziridinylethyl)amine

Formula: C<sub>4</sub>H<sub>10</sub>N<sub>2</sub>

MW: 86 Exact Mass: 86.0843983 CAS#: 4025-37-0 NIST#: 256578 ID#: 15466 DB: mainlib

E.

Hit 1 : Carbon dioxide  
CO<sub>2</sub>; MF: 809; RMF: 973; Prob 58.1%; CAS: 124-38-9; Lib: replib; ID: 3511.

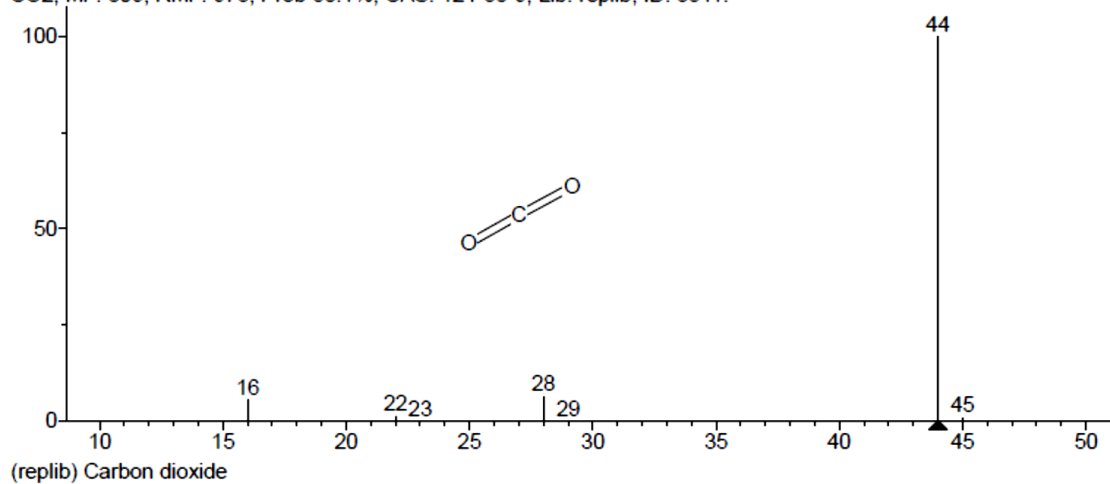

Name: Carbon dioxide

Formula: CO<sub>2</sub>

MW: 44 Exact Mass: 43.9898293 CAS#: 124-38-9 NIST#: 18873 ID#: 3511 DB: replib
