# Supplementary material
Source: MDPI journal article supplement (https://www.mdpi.com/2071-1050/13/19/10924)

**Figure S1.** Morphology of the native yeasts (A). Lev6; (B). Lev9; and (C) Lev30. a) 4x; b) 10x; c) 40x lens

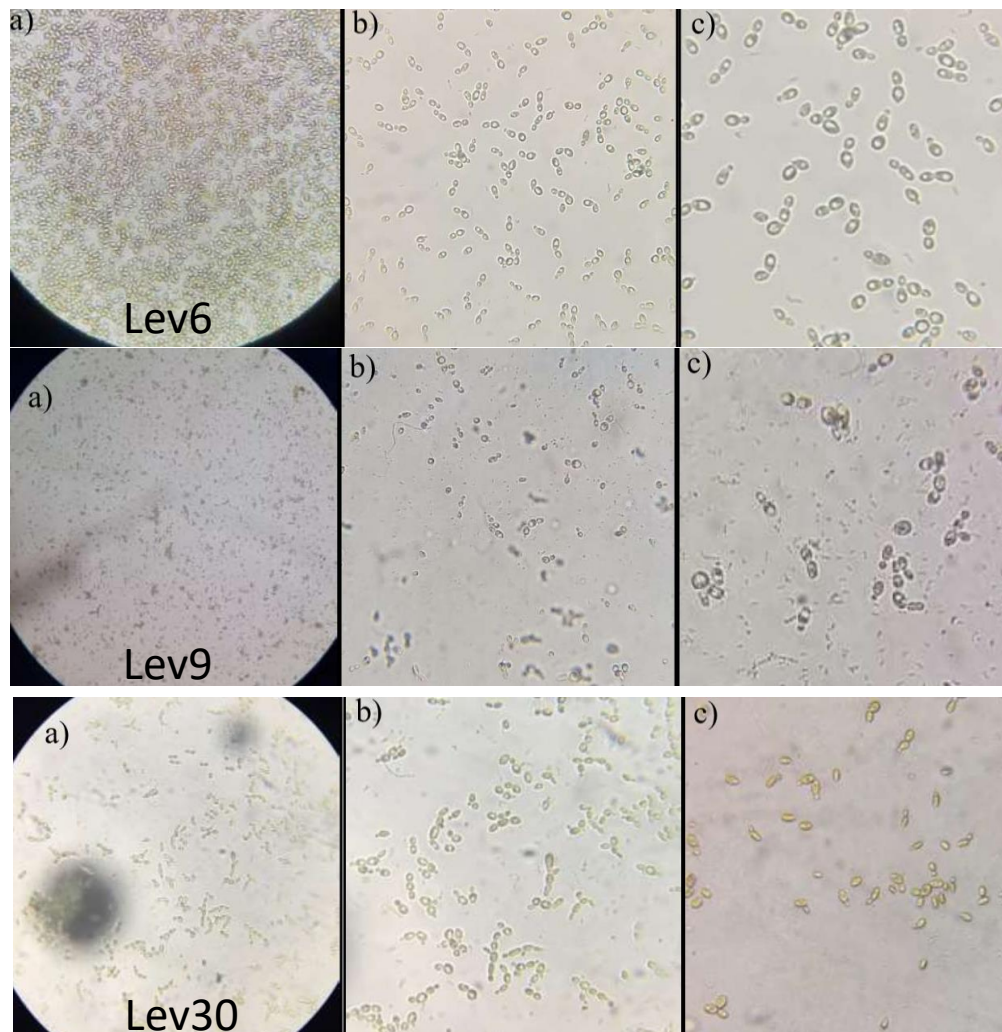

Supplement: s1 [file s1 › Figure S1.pdf]
